# Supplementary material for: Association of Food Intake with Sleep Durations in Adolescents from a Capital City in Northeastern Brazil
Source: MDPI journal article supplement (doi:10.3390/nu14235180), 2022-12-05
Supplement: s1 [file s1]

**Table S1.** Prevalence of consumption of ultra-processed foods with sleep duration in adolescents. São Luís, Maranhão, Brazil, 2016/2017.

| Food consumption                             | Sleep duration      |                    | p-value            |
|----------------------------------------------|---------------------|--------------------|--------------------|
|                                              | (≥ 6 hours)<br>Mean | (<6 hours)<br>Mean |                    |
| <b>Ultra-processed</b>                       |                     |                    |                    |
| <i>Cakes and cookies</i>                     | 7.79                | 7.90               | 0.823*             |
| <i>Sweets and candies</i>                    | 5.50                | 5.11               | 0.267*             |
| <i>Fast food</i>                             | 4.58                | 4.92               | <b>&lt;0.001**</b> |
| <i>Sugar-sweetened beverages</i>             | 3.92                | 3.66               | 0.322*             |
| <i>Salty cookies and potato french fries</i> | 3.86                | 3.51               | <b>&lt;0.000**</b> |
| <i>Cream cheese/industrialized yogurt</i>    | 1.40                | 1.28               | 0.439*             |
| <i>Margarine</i>                             | 1.15                | 1.33               | <b>0.025**</b>     |
| <i>Sausage and instant noodles</i>           | 1.06                | 1.11               | 0.543*             |
| <i>Ketchup and mayonnaise</i>                | 0.51                | 0.52               | <b>&lt;0.001**</b> |
| <i>Breakfast cereals and cereal bars</i>     | 0.53                | 0.35               | <b>&lt;0.000**</b> |

Caption: \* Student's t-test; \*\* Rank sum test.
